# Supplementary material
Source: Springer Nature journal article supplement (https://www.springermedizin.de/resource/supplementary/12913_2007_468_MOESM4_ESM.pdf/9534830)
Supplement: MOESM4 [file 9534830]

| Step                                  | Content                                                                                                                                                                                                                                                                                                                                                               | Who are involved?                                                                                                                                                  |
|---------------------------------------|-----------------------------------------------------------------------------------------------------------------------------------------------------------------------------------------------------------------------------------------------------------------------------------------------------------------------------------------------------------------------|--------------------------------------------------------------------------------------------------------------------------------------------------------------------|
| 1. Organizational preparation.        | <p>Contact human resource manager or OP to provide information about who is responsible for adjustments in the workplace and what procedures should be followed.</p> <p>Check if the supervisor of the employee involved has been informed about program, agrees with it and with its possible financial consequences.</p> <p>Plan appointment for conversations.</p> | <p>RTW-coordinator</p> <p>RTW-coordinator</p> <p>RTW-coordinator, employee and supervisor.</p>                                                                     |
| 2. Inventory of obstacles for RTW.    | <p>Observation of the workplace.</p> <p>Interviews about tasks and obstacles for RTW.</p> <p>Prioritize obstacles for RTW.</p>                                                                                                                                                                                                                                        | <p>RTW-coordinator and employee.</p> <p>RTW-coordinator has separate interviews with employee and supervisor.</p> <p>Employee, supervisor and RTW-coordinator.</p> |
| 3. Thinking of, collecting solutions. | <p>Thinks of or collect ideas for solutions.</p> <p>Prioritize solutions.</p>                                                                                                                                                                                                                                                                                         | <p>Employee, supervisor, RTW-coordinator and others.</p>                                                                                                           |
| 4. Preparation of the implementation. | <p>Plan for implementation of solutions.</p>                                                                                                                                                                                                                                                                                                                          | <p>Employee, supervisor and RTW-coordinator.</p>                                                                                                                   |
| 5. Implementing solutions.            | <p>Solutions will be implemented.</p> <p>Visit employee to give instructions at work.</p>                                                                                                                                                                                                                                                                             | <p>Depends on plan for RTW.</p> <p>RTW-coordinator and employee.</p>                                                                                               |
| 6. Evaluation/control.                | <p>Evaluation of situation by phone: have the solutions been implemented or have improvements been made?</p>                                                                                                                                                                                                                                                          | <p>RTW-coordinator has separate evaluations with employee and supervisor.</p>                                                                                      |
